# Supplementary material for: Zircon (U-Th)/He Closure Temperature Lower Than Apatite Thermochronometric Systems: Reconciliation of a Paradox
Source: MDPI journal article supplement (doi:10.3390/min12020145), 2022-01-25
Supplement: s1 [file s1]

*Supplementary material*

# **Zircon (U-Th)/He closure temperature lower than apatite thermochronometric systems: Reconciliation of a paradox**

**Benjamin Gérard <sup>1,\*</sup>, Xavier Robert <sup>1</sup>, Djordje Grujic <sup>2</sup>, Cécile Gautheron <sup>3</sup>, Laurence Audin <sup>1</sup>, Matthias Bernet <sup>1</sup> and Mélanie Balvay <sup>1</sup>**

<sup>1</sup> Université Grenoble Alpes, Université Savoie Mont Blanc, CNRS, IRD, IFSTTAR, ISTerre, 38000 Grenoble, France

<sup>2</sup> Dalhousie University, Halifax, Canada

<sup>3</sup> Université Paris-Saclay, CNRS, GEOPS, 91405, Orsay, France

\* Correspondence: benjamin.gerard.alpes@gmail.com; Presently at GET, Université de Toulouse, CNRS, IRD, UPS, Toulouse, France

We present hereafter the data files corresponding to the recounting of the AFT for the samples AB-17-68 and AB-17-69 (binomfit; Figures S1 and S2). We provide also the binomfit output files and the radial plots corresponding to the ZFT analysis for samples AB-17-64, AB-17-67 and AB-17-68 (Figures S3 to S5 respectively).

**NEW PARAMETERS - ZETA METHOD**EFFECTIVE TRACK DENSITY FOR FLUENCE MONITOR (tracks/cm<sup>2</sup>): 1,49E+06

RELATIVE ERROR (%): 1,37

EFFECTIVE URANIUM CONTENT OF MONITOR (ppm): 15,00

ZETA FACTOR AND STANDARD ERROR (yr cm<sup>2</sup>): 270,90 9,61SIZE OF COUNTER SQUARE (cm<sup>2</sup>): 6,39E-07**GRAIN AGES IN ORIGINAL ORDER**

| Grain no. | RhoS (cm <sup>-2</sup> ) | (Ns)  | RhoI (cm <sup>-2</sup> ) | (Ni)   | Squares | U+/-2s | Grain Age (Ma) |            |       |
|-----------|--------------------------|-------|--------------------------|--------|---------|--------|----------------|------------|-------|
|           |                          |       |                          |        |         |        | Age            | --95% CI-- |       |
| 1         | 3,48E+05                 | ( 4)  | 3,13E+06                 | ( 36)  | 18      | 32 10  | 23.2           | 5.8        | 62.3  |
| 2         | 6,57E+05                 | ( 21) | 6,76E+06                 | ( 216) | 50      | 68 9   | 19.7           | 11.9       | 30.7  |
| 3         | 8,35E+05                 | ( 8)  | 9,29E+06                 | ( 89)  | 15      | 93 20  | 18.5           | 7.6        | 37.2  |
| 4         | 1,25E+06                 | ( 8)  | 1,42E+07                 | ( 91)  | 10      | 143 30 | 18.1           | 7.4        | 36.4  |
| 5         | 4,79E+05                 | ( 15) | 6,13E+06                 | ( 192) | 49      | 62 9   | 15.9           | 8.6        | 26.6  |
| 6         | 4,35E+05                 | ( 5)  | 4,26E+06                 | ( 49)  | 18      | 43 12  | 21.2           | 6.4        | 51.2  |
| 7         | 2,87E+05                 | ( 9)  | 1,85E+06                 | ( 58)  | 49      | 19 5   | 31.7           | 13.6       | 63.4  |
| 8         | 1,74E+05                 | ( 1)  | 1,74E+06                 | ( 10)  | 9       | 18 11  | 22.7           | 0.5        | 140.4 |
| 9         | 1,10E+06                 | ( 7)  | 1,11E+07                 | ( 71)  | 10      | 112 27 | 20.3           | 7.7        | 43.1  |
| 10        | 0,00E+00                 | ( 0)  | 2,44E+06                 | ( 39)  | 25      | 25 8   | 3.6            | 0.1        | 20.0  |
| POOLED    | 4,82E+05                 | ( 78) | 5,26E+06                 | ( 851) | 253     | 53 4   | 18.5           | 14.5       | 23.5  |

CHI<sup>2</sup> PROBABILITY (%): 69.4>>> Beware: possible upward bias in Chi<sup>2</sup> probability due to low counts <<<

POOLED AGE W/ 68% CONF. INTERVAL (Ma): 18.5, 16.3 -- 20.9 ( -2.2 +2.4)  
 95% CONF. INTERVAL (Ma): 14.5 -- 23.5 ( -4.0 +5.1)

CENTRAL AGE W/ 68% CONF. INTERVAL (Ma): 18.5, 16.3 -- 20.9 ( -2.2 +2.4)  
 95% CONF. INTERVAL (Ma): 14.5 -- 23.6 ( -4.0 +5.1)  
 AGE DISPERSION (%): 0.2

**Figure S1.** binomfit output file for sample AB-17-68 (AFT dating).**NEW PARAMETERS - ZETA METHOD**EFFECTIVE TRACK DENSITY FOR FLUENCE MONITOR (tracks/cm<sup>2</sup>): 1,49E+06

RELATIVE ERROR (%): 1,42

EFFECTIVE URANIUM CONTENT OF MONITOR (ppm): 15,00

ZETA FACTOR AND STANDARD ERROR (yr cm<sup>2</sup>): 270,90 9,61SIZE OF COUNTER SQUARE (cm<sup>2</sup>): 6,39E-07**GRAIN AGES IN ORIGINAL ORDER**

| Grain no. | RhoS (cm <sup>-2</sup> ) | (Ns) | RhoI (cm <sup>-2</sup> ) | (Ni)   | Squares | U+/-2s | Grain Age (Ma) |            |      |
|-----------|--------------------------|------|--------------------------|--------|---------|--------|----------------|------------|------|
|           |                          |      |                          |        |         |        | Age            | --95% CI-- |      |
| 1         | 4,89E+04                 | ( 1) | 1,86E+06                 | ( 38)  | 32      | 19 6   | 6.1            | 0.1        | 31.4 |
| 2         | 6,26E+04                 | ( 1) | 2,25E+06                 | ( 36)  | 25      | 23 8   | 6.4            | 0.1        | 33.3 |
| 3         | 0,00E+00                 | ( 0) | 2,70E+06                 | ( 62)  | 36      | 27 7   | 2.3            | 0.1        | 12.4 |
| 4         | 0,00E+00                 | ( 0) | 2,54E+06                 | ( 26)  | 16      | 26 10  | 5.5            | 0.2        | 30.8 |
| 5         | 0,00E+00                 | ( 0) | 1,59E+06                 | ( 71)  | 70      | 16 4   | 2.0            | 0.1        | 10.8 |
| 6         | 0,00E+00                 | ( 0) | 4,07E+05                 | ( 13)  | 50      | 4 2    | 11.1           | 0.4        | 66.0 |
| 7         | 1,12E+05                 | ( 2) | 2,01E+06                 | ( 36)  | 28      | 20 7   | 12.0           | 1.3        | 43.5 |
| 8         | 0,00E+00                 | ( 0) | 1,65E+06                 | ( 38)  | 36      | 17 5   | 3.7            | 0.1        | 20.6 |
| 9         | 5,22E+04                 | ( 1) | 2,30E+06                 | ( 44)  | 30      | 23 7   | 5.2            | 0.1        | 26.9 |
| 10        | 7,82E+04                 | ( 3) | 2,61E+06                 | ( 100) | 60      | 26 5   | 6.4            | 1.2        | 18.2 |
| 11        | 0,00E+00                 | ( 0) | 2,27E+06                 | ( 58)  | 40      | 23 6   | 2.4            | 0.1        | 13.3 |
| POOLED    | 2,96E+04                 | ( 8) | 1,93E+06                 | ( 522) | 423     | 19 2   | 3.2            | 1.3        | 6.2  |

CHI<sup>2</sup> PROBABILITY (%): 45.2>>> Beware: possible upward bias in Chi<sup>2</sup> probability due to low counts <<<

POOLED AGE W/ 68% CONF. INTERVAL (Ma): 3.2, 2.0 -- 4.6 ( -1.1 +1.5)  
 95% CONF. INTERVAL (Ma): 1.3 -- 6.2 ( -1.8 +3.0)

CENTRAL AGE W/ 68% CONF. INTERVAL (Ma): 3.1, 2.2 -- 4.4 ( -0.9 +1.3)  
 95% CONF. INTERVAL (Ma): 1.5 -- 6.3 ( -1.6 +3.2)  
 AGE DISPERSION (%): 13.6

**Figure S2.** binomfit output file for sample AB-17-69 (AFT dating).

## NEW PARAMETERS - ZETA METHOD

EFFECTIVE TRACK DENSITY FOR FLUENCE MONITOR (tracks/cm<sup>2</sup>): 3.92E+05

RELATIVE ERROR (%): 1.45

EFFECTIVE URANIUM CONTENT OF MONITOR (ppm): 50.00

ZETA FACTOR AND STANDARD ERROR (yr cm<sup>2</sup>): 131.49 5.30SIZE OF COUNTER SQUARE (cm<sup>2</sup>): 6.39E-07

## GRAIN AGES IN ORIGINAL ORDER

| Grain no. | RhoS (cm <sup>-2</sup> ) | (Ns)   | RhoI (cm <sup>-2</sup> ) | (Ni)    | Squares | U+/-2s   | Grain Age (Ma) |            |      |
|-----------|--------------------------|--------|--------------------------|---------|---------|----------|----------------|------------|------|
|           |                          |        |                          |         |         |          | Age            | --95% CI-- |      |
| 1         | 1.13E+06                 | ( 36)  | 7.07E+06                 | ( 226)  | 50      | 903 123  | 4.1            | 2.8        | 5.9  |
| 2         | 7.20E+05                 | ( 23)  | 2.72E+06                 | ( 87)   | 50      | 348 75   | 6.8            | 4.1        | 10.9 |
| 3         | 1.04E+06                 | ( 20)  | 8.61E+06                 | ( 165)  | 30      | 1099 174 | 3.1            | 1.9        | 5.0  |
| 4         | 7.82E+05                 | ( 20)  | 6.34E+06                 | ( 162)  | 40      | 809 129  | 3.2            | 1.9        | 5.1  |
| 5         | 1.37E+06                 | ( 14)  | 7.14E+06                 | ( 73)   | 16      | 912 214  | 5.0            | 2.6        | 8.8  |
| 6         | 1.41E+06                 | ( 36)  | 5.59E+06                 | ( 143)  | 40      | 715 121  | 6.5            | 4.4        | 9.4  |
| 7         | 1.13E+06                 | ( 29)  | 5.59E+06                 | ( 143)  | 40      | 715 121  | 5.2            | 3.4        | 7.8  |
| 8         | 1.56E+06                 | ( 40)  | 8.14E+06                 | ( 208)  | 40      | 1039 147 | 5.0            | 3.4        | 7.0  |
| 9         | 1.35E+06                 | ( 43)  | 5.35E+06                 | ( 171)  | 50      | 684 106  | 6.5            | 4.5        | 9.1  |
| 10        | 2.47E+06                 | ( 79)  | 1.40E+07                 | ( 448)  | 50      | 1791 177 | 4.5            | 3.5        | 5.8  |
| 11        | 8.87E+05                 | ( 17)  | 3.65E+06                 | ( 70)   | 30      | 466 112  | 6.3            | 3.4        | 10.7 |
| 12        | 3.68E+06                 | ( 47)  | 1.41E+07                 | ( 180)  | 20      | 1799 273 | 6.7            | 4.8        | 9.3  |
| 13        | 1.06E+06                 | ( 27)  | 4.69E+06                 | ( 120)  | 40      | 600 111  | 5.8            | 3.7        | 8.9  |
| 14        | 2.05E+06                 | ( 21)  | 8.31E+06                 | ( 85)   | 16      | 1062 232 | 6.4            | 3.7        | 10.4 |
| 15        | 9.00E+05                 | ( 23)  | 3.52E+06                 | ( 90)   | 40      | 450 95   | 6.6            | 4.0        | 10.5 |
| 16        | 1.51E+06                 | ( 29)  | 6.99E+06                 | ( 134)  | 30      | 893 156  | 5.6            | 3.6        | 8.4  |
| 17        | 1.56E+06                 | ( 16)  | 3.91E+06                 | ( 40)   | 16      | 500 158  | 10.4           | 5.4        | 18.8 |
| 18        | 1.37E+06                 | ( 14)  | 5.97E+06                 | ( 61)   | 16      | 762 196  | 6.0            | 3.0        | 10.7 |
| 19        | 2.27E+06                 | ( 29)  | 1.09E+07                 | ( 139)  | 20      | 1389 239 | 5.4            | 3.5        | 8.1  |
| 20        | 1.25E+06                 | ( 24)  | 5.53E+06                 | ( 106)  | 30      | 706 138  | 5.9            | 3.6        | 9.1  |
| POOLED    | 1.38E+06                 | ( 587) | 6.72E+06                 | ( 2851) | 664     | 858 41   | 5.3            | 4.7        | 6.0  |

CHI<sup>2</sup> PROBABILITY (%): 10.1

POOLED AGE W/ 68% CONF. INTERVAL (Ma): 5.3, 5.0 -- 5.6 ( -0.3 +0.3)  
95% CONF. INTERVAL (Ma): 4.7 -- 6.0 ( -0.6 +0.7)

CENTRAL AGE W/ 68% CONF. INTERVAL (Ma): 5.4, 5.0 -- 5.8 ( -0.4 +0.4)  
95% CONF. INTERVAL (Ma): 4.7 -- 6.2 ( -0.7 +0.8)  
AGE DISPERSION (%): 11.9

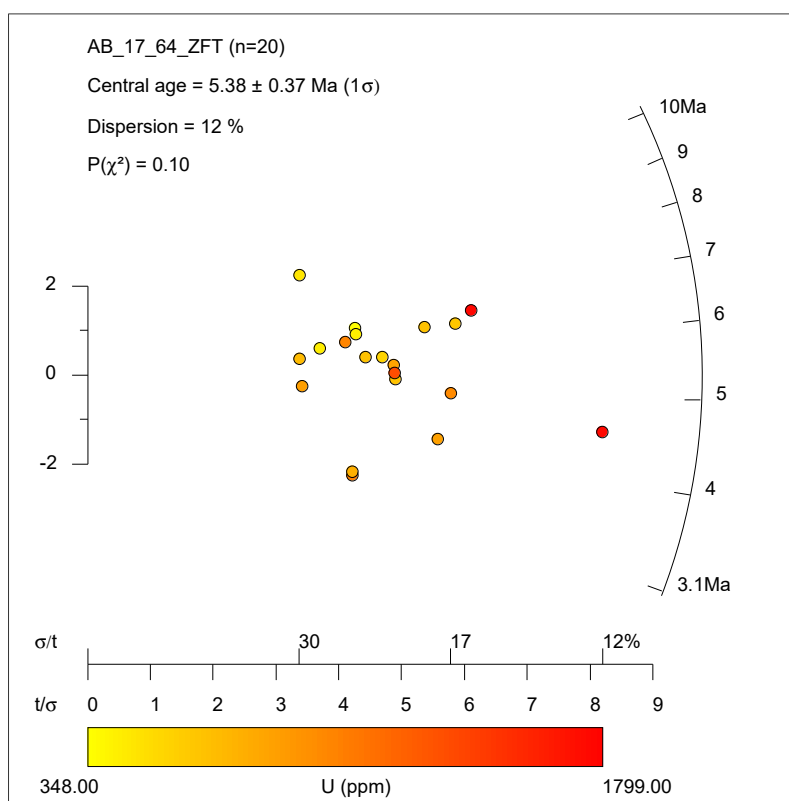

Figure S3. binomfit output file for sample AB-17-64 (ZFT dating).

## NEW PARAMETERS - ZETA METHOD

EFFECTIVE TRACK DENSITY FOR FLUENCE MONITOR (tracks/cm<sup>2</sup>): 3.91E+05  
 RELATIVE ERROR (%): 1.47  
 EFFECTIVE URANIUM CONTENT OF MONITOR (ppm): 50.00  
 ZETA FACTOR AND STANDARD ERROR (yr cm<sup>2</sup>): 131.49 5.30  
 SIZE OF COUNTER SQUARE (cm<sup>2</sup>): 6.39E-07

## GRAIN AGES IN ORIGINAL ORDER

| Grain no.                                                      | RhoS (cm <sup>-2</sup> ) | (Ns)  | RhoI (cm <sup>-2</sup> ) | (Ni)   | Squares | U+/-2s   | Grain Age (Ma) |            |      |
|----------------------------------------------------------------|--------------------------|-------|--------------------------|--------|---------|----------|----------------|------------|------|
|                                                                |                          |       |                          |        |         |          | Age            | --95% CI-- |      |
| 1                                                              | 1.10E+06                 | ( 21) | 3.86E+06                 | ( 74)  | 30      | 493 115  | 7.3            | 4.3        | 12.0 |
| 2                                                              | 9.39E+05                 | ( 24) | 5.20E+06                 | ( 133) | 40      | 665 117  | 4.7            | 2.9        | 7.2  |
| 3                                                              | 6.26E+05                 | ( 20) | 2.25E+06                 | ( 72)  | 50      | 288 68   | 7.2            | 4.1        | 11.9 |
| 4                                                              | 6.85E+05                 | ( 7)  | 1.17E+06                 | ( 12)  | 16      | 150 85   | 15.1           | 5.0        | 41.3 |
| 5                                                              | 1.04E+06                 | ( 20) | 4.12E+06                 | ( 79)  | 30      | 526 119  | 6.6            | 3.8        | 10.8 |
| 6                                                              | 5.63E+05                 | ( 18) | 2.35E+06                 | ( 75)  | 50      | 300 70   | 6.2            | 3.5        | 10.4 |
| 7                                                              | 1.08E+06                 | ( 11) | 4.69E+06                 | ( 48)  | 16      | 600 173  | 6.0            | 2.8        | 11.5 |
| 8                                                              | 1.25E+06                 | ( 24) | 5.63E+06                 | ( 108) | 30      | 720 140  | 5.7            | 3.5        | 9.0  |
| 9                                                              | 1.06E+06                 | ( 27) | 3.44E+06                 | ( 88)  | 40      | 440 94   | 7.9            | 4.9        | 12.3 |
| 10                                                             | 1.19E+06                 | ( 38) | 5.23E+06                 | ( 167) | 50      | 668 105  | 5.9            | 4.0        | 8.4  |
| 11                                                             | 6.78E+05                 | ( 13) | 2.71E+06                 | ( 52)  | 30      | 347 96   | 6.5            | 3.2        | 12.0 |
| 12                                                             | 1.66E+06                 | ( 53) | 6.51E+06                 | ( 208) | 50      | 832 118  | 6.6            | 4.7        | 8.9  |
| 13                                                             | 9.70E+05                 | ( 31) | 2.88E+06                 | ( 92)  | 50      | 368 77   | 8.7            | 5.6        | 13.2 |
| 14                                                             | 1.80E+06                 | ( 23) | 4.62E+06                 | ( 59)  | 20      | 590 154  | 10.1           | 5.9        | 16.5 |
| 15                                                             | 1.15E+06                 | ( 22) | 5.69E+06                 | ( 109) | 30      | 726 140  | 5.2            | 3.1        | 8.3  |
| 16                                                             | 1.25E+06                 | ( 32) | 3.91E+06                 | ( 100) | 40      | 500 101  | 8.3            | 5.3        | 12.4 |
| 17                                                             | 7.82E+05                 | ( 10) | 3.91E+06                 | ( 50)  | 20      | 500 141  | 5.2            | 2.3        | 10.3 |
| 18                                                             | 1.00E+06                 | ( 16) | 4.44E+06                 | ( 71)  | 25      | 568 135  | 5.8            | 3.1        | 10.1 |
| 19                                                             | 1.02E+06                 | ( 26) | 3.05E+06                 | ( 78)  | 40      | 390 89   | 8.6            | 5.3        | 13.5 |
| 20                                                             | 3.03E+06                 | ( 31) | 9.88E+06                 | ( 101) | 16      | 1262 253 | 7.9            | 5.1        | 11.9 |
| POOLED 1.09E+06 ( 467) 4.13E+06 ( 1776) 673 528 29 6.8 5.9 7.7 |                          |       |                          |        |         |          |                |            |      |

CHI<sup>2</sup> PROBABILITY (%): 59.2>>> Beware: possible upward bias in Chi<sup>2</sup> probability due to low counts <<<

POOLED AGE W/ 68% CONF. INTERVAL (Ma): 6.8, 6.3 -- 7.2 ( -0.4 +0.5)  
 95% CONF. INTERVAL (Ma): 5.9 -- 7.7 ( -0.8 +1.0)

CENTRAL AGE W/ 68% CONF. INTERVAL (Ma): 6.8, 6.3 -- 7.2 ( -0.4 +0.5)  
 95% CONF. INTERVAL (Ma): 5.9 -- 7.7 ( -0.8 +1.0)  
 AGE DISPERSION (%): 0.7

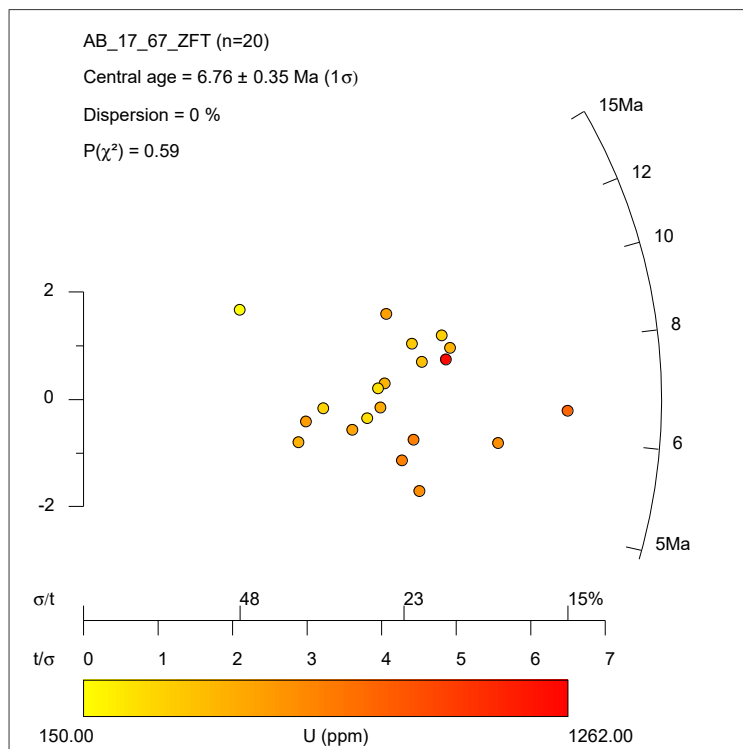

Figure S4. binomfit output file for sample AB-17-67 (ZFT dating).

## NEW PARAMETERS - ZETA METHOD

EFFECTIVE TRACK DENSITY FOR FLUENCE MONITOR (tracks/cm<sup>2</sup>): 3.91E+05  
 RELATIVE ERROR (%): 1.50  
 EFFECTIVE URANIUM CONTENT OF MONITOR (ppm): 50.00  
 ZETA FACTOR AND STANDARD ERROR (yr cm<sup>2</sup>): 131.49 5.30  
 SIZE OF COUNTER SQUARE (cm<sup>2</sup>): 6.39E-07

## GRAIN AGES IN ORIGINAL ORDER

| Grain no.                                                      | RhoS (cm <sup>-2</sup> ) | (Ns) | RhoI (cm <sup>-2</sup> ) | (Ni) | Squares | U+/-2s  | Grain Age (Ma) |            |      |
|----------------------------------------------------------------|--------------------------|------|--------------------------|------|---------|---------|----------------|------------|------|
|                                                                |                          |      |                          |      |         |         | Age            | --95% CI-- |      |
| 1                                                              | 1.00E+06 ( 23)           |      | 3.04E+06 ( 70)           |      | 36      | 389 93  | 8.5            | 5.0        | 13.7 |
| 2                                                              | 9.39E+05 ( 12)           |      | 4.69E+06 ( 60)           |      | 20      | 600 155 | 5.2            | 2.5        | 9.7  |
| 3                                                              | 5.74E+05 ( 11)           |      | 3.18E+06 ( 61)           |      | 30      | 407 104 | 4.7            | 2.2        | 8.9  |
| 4                                                              | 1.37E+06 ( 14)           |      | 4.21E+06 ( 43)           |      | 16      | 537 164 | 8.4            | 4.2        | 15.6 |
| 5                                                              | 1.66E+06 ( 17)           |      | 3.91E+06 ( 40)           |      | 16      | 500 158 | 11.0           | 5.8        | 19.7 |
| 6                                                              | 5.59E+05 ( 5)            |      | 2.01E+06 ( 18)           |      | 14      | 257 120 | 7.3            | 2.1        | 20.0 |
| 7                                                              | 8.22E+05 ( 21)           |      | 2.39E+06 ( 61)           |      | 40      | 305 78  | 8.9            | 5.1        | 14.8 |
| 8                                                              | 1.60E+06 ( 41)           |      | 5.95E+06 ( 152)          |      | 40      | 760 125 | 7.0            | 4.8        | 9.9  |
| 9                                                              | 9.39E+05 ( 18)           |      | 4.02E+06 ( 77)           |      | 30      | 513 118 | 6.1            | 3.4        | 10.1 |
| 10                                                             | 1.56E+06 ( 20)           |      | 5.24E+06 ( 67)           |      | 20      | 670 164 | 7.7            | 4.4        | 12.8 |
| 11                                                             | 1.72E+06 ( 22)           |      | 5.32E+06 ( 68)           |      | 20      | 680 166 | 8.4            | 4.9        | 13.6 |
| 12                                                             | 1.76E+06 ( 18)           |      | 5.87E+06 ( 60)           |      | 16      | 750 194 | 7.8            | 4.3        | 13.3 |
| 13                                                             | 1.33E+06 ( 34)           |      | 6.03E+06 ( 154)          |      | 40      | 770 126 | 5.7            | 3.8        | 8.3  |
| 14                                                             | 1.51E+06 ( 29)           |      | 4.59E+06 ( 88)           |      | 30      | 587 126 | 8.5            | 5.4        | 13.0 |
| 15                                                             | 1.66E+06 ( 17)           |      | 7.24E+06 ( 74)           |      | 16      | 925 216 | 6.0            | 3.3        | 10.1 |
| 16                                                             | 1.64E+06 ( 21)           |      | 5.79E+06 ( 74)           |      | 20      | 740 173 | 7.3            | 4.3        | 12.0 |
| 17                                                             | 8.09E+05 ( 31)           |      | 3.29E+06 ( 126)          |      | 60      | 420 76  | 6.4            | 4.1        | 9.4  |
| 18                                                             | 1.66E+06 ( 17)           |      | 3.72E+06 ( 38)           |      | 16      | 475 154 | 11.6           | 6.1        | 20.9 |
| 19                                                             | 1.25E+06 ( 16)           |      | 5.63E+06 ( 72)           |      | 20      | 720 170 | 5.8            | 3.1        | 9.9  |
| 20                                                             | 1.21E+06 ( 31)           |      | 4.19E+06 ( 107)          |      | 40      | 535 104 | 7.5            | 4.8        | 11.2 |
| POOLED 1.21E+06 ( 418) 4.38E+06 ( 1510) 540 559 33 7.1 6.2 8.2 |                          |      |                          |      |         |         |                |            |      |

CHI^2 PROBABILITY (%): 78.6

&gt;&gt;&gt; Beware: possible upward bias in Chi^2 probability due to low counts &lt;&lt;&lt;

POOLED AGE W/ 68% CONF. INTERVAL (Ma): 7.1, 6.6 -- 7.6 ( -0.5 +0.5)  
 95% CONF. INTERVAL (Ma): 6.2 -- 8.2 ( -0.9 +1.0)

CENTRAL AGE W/ 68% CONF. INTERVAL (Ma): 7.1, 6.6 -- 7.6 ( -0.5 +0.5)  
 95% CONF. INTERVAL (Ma): 6.2 -- 8.2 ( -0.9 +1.0)  
 AGE DISPERSION (%): 0.3

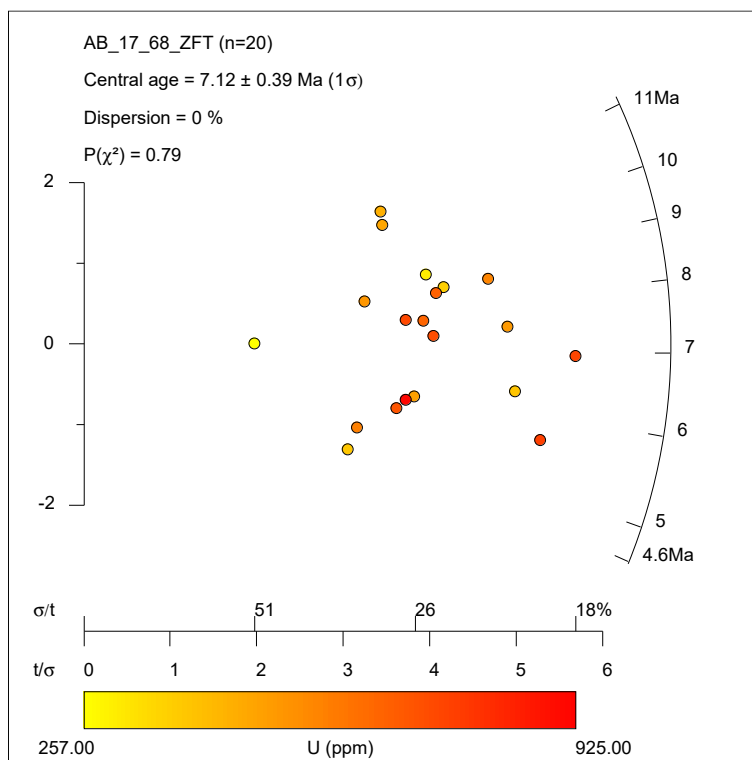

Figure S5. binomfit output file for sample AB-17-68 (ZFT dating).
